# Supplementary material
Source: PubMed Central journal article supplement (PMC3335744)
Supplement: NIHMS371212-supplement-Suppl_Data.pdf [file NIHMS371212-supplement-Suppl_Data.pdf]

## Supplemental Table 1: Distribution of Papillomas

---

|             |     |
|-------------|-----|
| Site (n=22) |     |
| Back        | 9%  |
| Feet        | 44% |
| Eyelid      | 6%  |
| Perianal    | 35% |
| Tail        | 6%  |

---

20 of 27 *Msx2-Cre; Kras<sup>G12D</sup>* mice developed papillomas at one site.

1 of 27 *Msx2-Cre; Kras<sup>G12D</sup>* mice developed papillomas at two independent sites.

**Supplemental Figure 1. *Kras*-induced Spontaneous Perianal Papillomas**

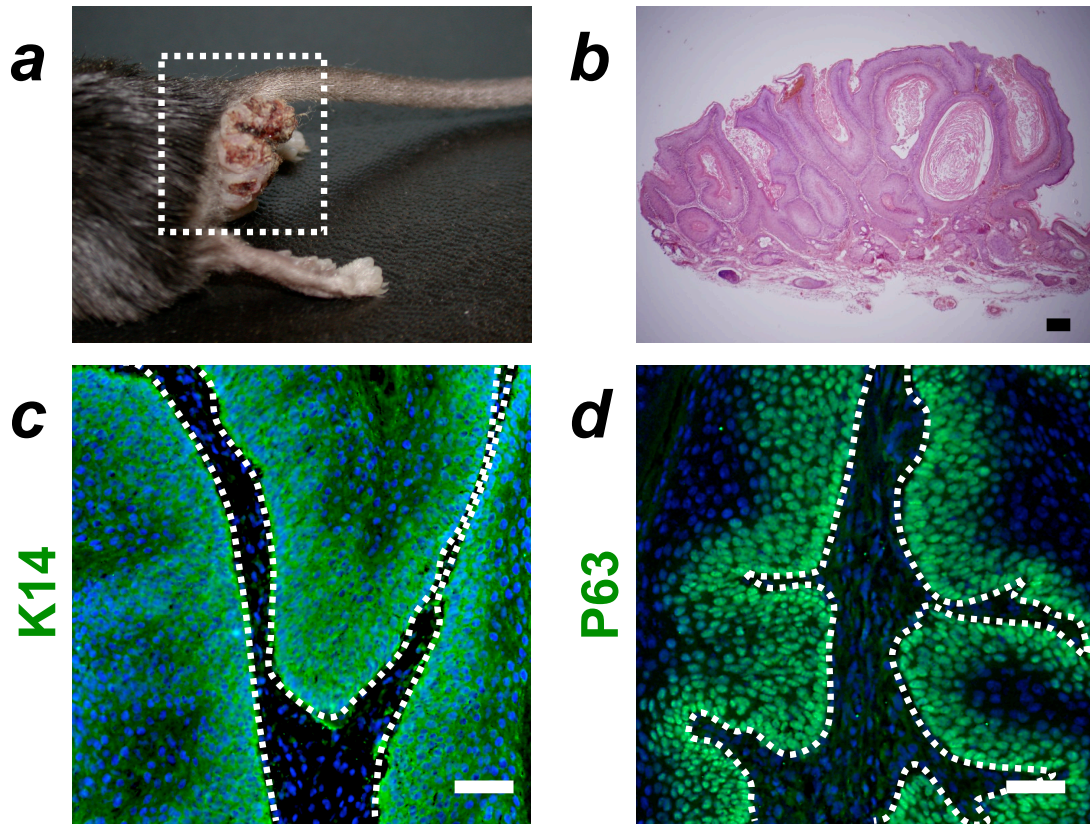

**Supp. Figure 1. *Kras*-induced spontaneous perianal papillomas**  
(a) Highly penetrant perianal papillomas in *Msx2-Cre; Kras<sup>G12D</sup>* mice.  
(b) Low power histologic section of perianal papilloma and benign architecture. Scale bar (black) = 200  $\mu$ m. (c) K14 immunostain demonstrating lack of invasive epithelial cells. Dotted line denotes dermal-epidermal junction. Scale bar (white) = 50  $\mu$ m. (d) P63 immunostaining reveals intact epidermis without evidence of invasion.

**Supplemental Table 2**

|                                          | <u>Description</u>                                         | <u>Age</u> | <u>wildtype</u>      | <u>Kras<sup>G12D</sup></u> |          |
|------------------------------------------|------------------------------------------------------------|------------|----------------------|----------------------------|----------|
| <b>Interfollicular epithelium (skin)</b> | Anterior-Posterior length ( <i>ratio of surface/base</i> ) | P0-P5      | 1.015 ± 0.016<br>n=3 | 1.04 ± 0.011<br>n=4        | p=0.582  |
|                                          |                                                            | P10        | 1.013 ± 0.004<br>n=6 | 1.108 ± 0.032<br>n=5       | p=0.004  |
|                                          | density ( <i>nuclei per 100µm</i> )                        | P0-P5      | 12.2 ± 0.3<br>n=7    | 13.4 ± 0.8<br>n=7          | p=0.083  |
|                                          |                                                            | P7-P10     | 13.3 ± 0.9<br>n=4    | 18.0 ± 1.7<br>n=5          | p=0.016  |
|                                          | Ki67 (% nuclei positive)                                   | P4-P10     | 27.8 ± 5.0<br>n=4    | 52.1 ± 6.7<br>n=6          | p=0.0095 |
| <b>Nail</b>                              | length in mm                                               | P47        | 2.70 ± 0.09<br>n=3   | 2.41 ± 0.08<br>n=5         | p=0.036  |

| <u>Cre-mediated excision of LSL</u> | <u>Description Hair follicle (HF)</u> | <u>LSL product vs. GAPDH</u> |
|-------------------------------------|---------------------------------------|------------------------------|
| K15-Cre; Kras #1                    | Beta-gal positive HF                  | 56.23 ± 8.12%                |
| K15-Cre; Kras #2                    | Beta-gal positive HF                  | 6.23 ± 0.98%                 |
| K15-Cre; Kras #1                    | Beta-gal negative HF                  | 100.00 ± 17.35%              |
| K15-Cre; Kras #2                    | Beta-gal negative HF                  | 100.00 ± 20.91%              |
| No LSL-Kras #3                      | Beta-gal negative HF, No Cre,         | 0.12%                        |
